# Supplementary material for: Responsive hetero-organelle partition conferred fluorogenic sensing of mitochondrial depolarization
Source: PubMed Central journal article supplement — Chem Sci. 2016 Nov 8;8(3):1915–21. doi: 10.1039/c6sc04158b (PMC5364656; doi:10.1039/c6sc04158b), 2016-11-08
Supplement: SC-008-C6SC04158B-s001.pdf [file SC-008-C6SC04158B-s001.pdf]

# Responsive hetero-organelle partition conferred fluorogenic sensing of mitochondrial depolarization

Zhongwei Xue,<sup>a</sup> Hu Zhao,<sup>a</sup> Jian Liu,<sup>a</sup> Jiahuai Han,<sup>b</sup> and Shoufa Han<sup>a,\*</sup>

<sup>a</sup> State Key Laboratory for Physical Chemistry of Solid Surfaces, Department of Chemical Biology, College of Chemistry and Chemical Engineering, the Key Laboratory for Chemical Biology of Fujian Province, The MOE Key Laboratory of Spectrochemical Analysis & Instrumentation, and Innovation Center for Cell Signaling Network, Xiamen University; <sup>b</sup>State key Laboratory of Cellular Stress Biology, Innovation Center for Cell Signaling Network, School of Life Sciences, Xiamen University, Xiamen, 361005, China

## Outline

**Fig. S1** Accumulation of RC-TPP in mitochondria.

**Fig. S2** Intracellular distributions of RC as compared to RC-TPP.

**Fig. S3** Effects of CCCP on intracellular distribution of RC-TPP.

**Fig. S4** Lysosomal acidity dependent rhodamine fluorescence of RC-TPP.

**Fig. S5** Cytotoxicity of RC-TPP.

**Fig. S6** <sup>1</sup>H-NMR Spectrum of ROX-EDA-TPP

**Fig. S7** <sup>13</sup>C-NMR Spectrum of ROX-EDA-TPP

**Fig. S8** <sup>1</sup>H-NMR Spectrum of RC-TPP

**Fig. S9** <sup>13</sup>C-NMR Spectrum of RC-TPP

**Fig. S10** <sup>1</sup>H-NMR Spectrum of ROX-ETA

**Fig. S11** <sup>13</sup>C-NMR Spectrum of ROX-ETA

**Fig. S12** <sup>1</sup>H-NMR Spectrum of RC

**Fig. S13** <sup>13</sup>C-NMR Spectrum of RC

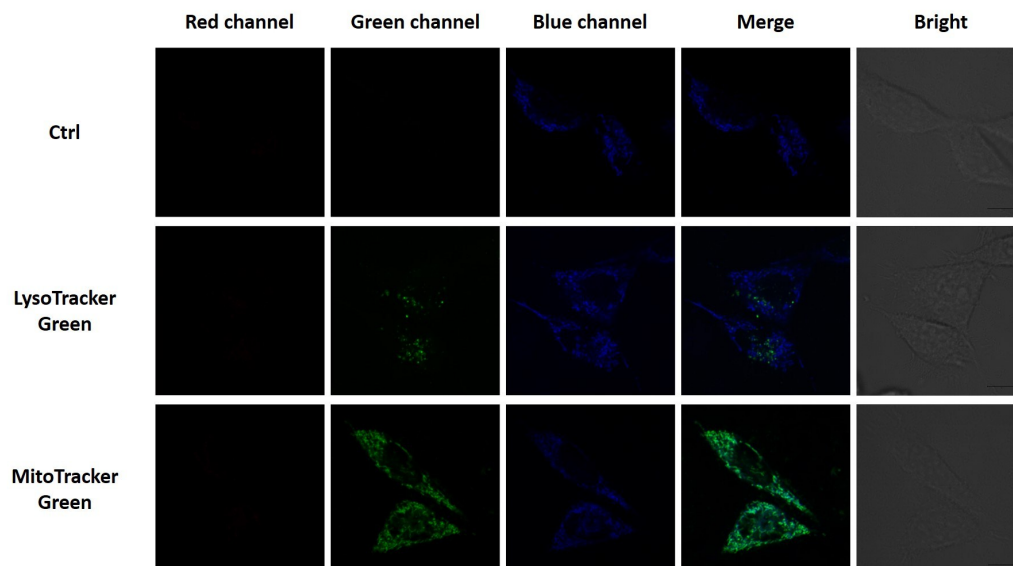

**Fig. S1** Accumulation of RC-TPP in mitochondria. L929 cells were stained with RC-TPP (1  $\mu$ M) in the presence of LysoTracker green (2  $\mu$ M) or Mitotracker green (1  $\mu$ M), and then probed by confocal microscopy. Colocalization of coumarin signal with green fluorescence is shown in cyan.

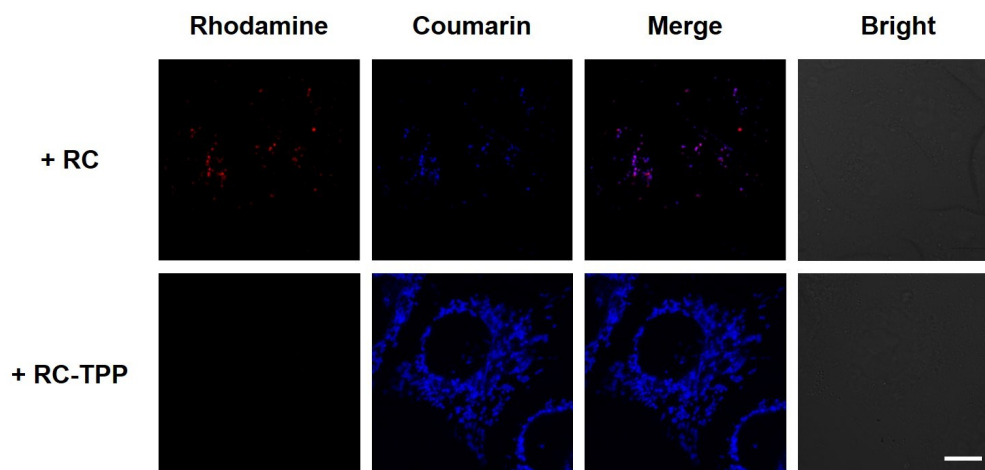

**Fig. S2** Intracellular distributions of RC as compared to RC-TPP. HeLa cells were cultured in DMEM spiked with RC-TPP (1  $\mu$ M) or RC (1  $\mu$ M), and then analyzed with a confocal fluorescence microscope. Overlay of rhodamine signal with coumarin signal was shown in cyan. Bar, 10  $\mu$ m.

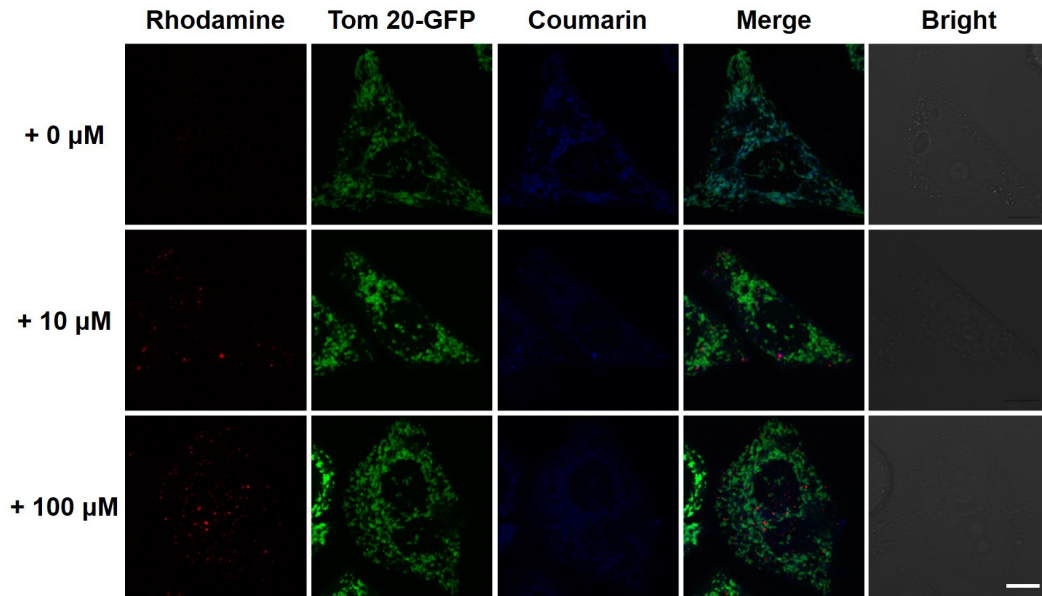

**Fig. S3** Effects of CCCP on intracellular distribution of RC-TPP. Tom20-GFP expressing HeLa cells were incubated with RC-TPP (2  $\mu\text{M}$ ) for 1 h in the absence or presence of different dose of CCCP (0, 10, 100  $\mu\text{M}$ ). The cells were analyzed by confocal fluorescence microscopy to pinpoint the locations of RC-TPP as compared to Tom20-GFP. Bar, 10  $\mu\text{m}$ .

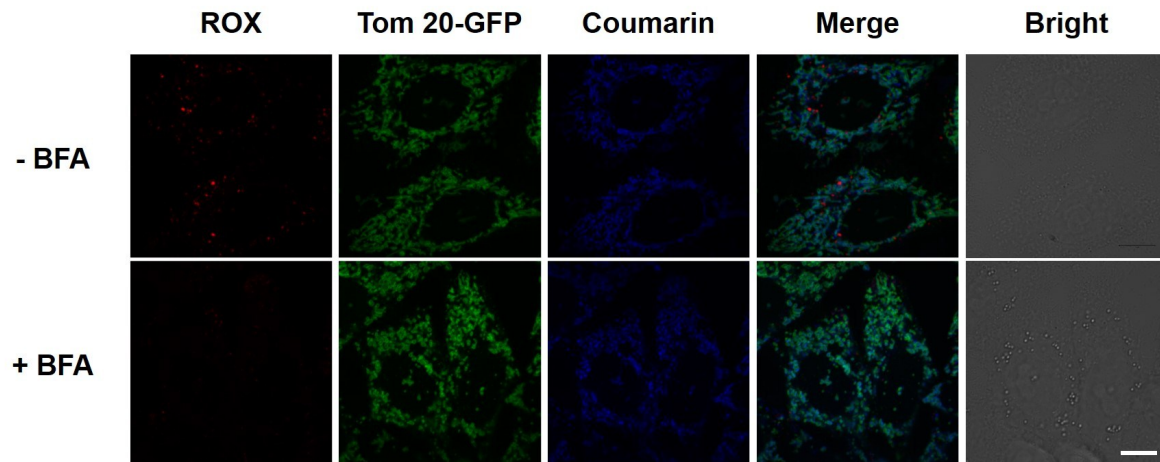

**Fig. S4** Lysosomal acidity dependent rhodamine fluorescence of RC-TPP. Tom 20-GFP expressing HeLa cells were stained with RC-TPP (3  $\mu\text{M}$ ) for 30 min then incubated in DMEM with or without BFA (200 nM) for 1 h. The cells were analyzed with a confocal fluorescence microscope.

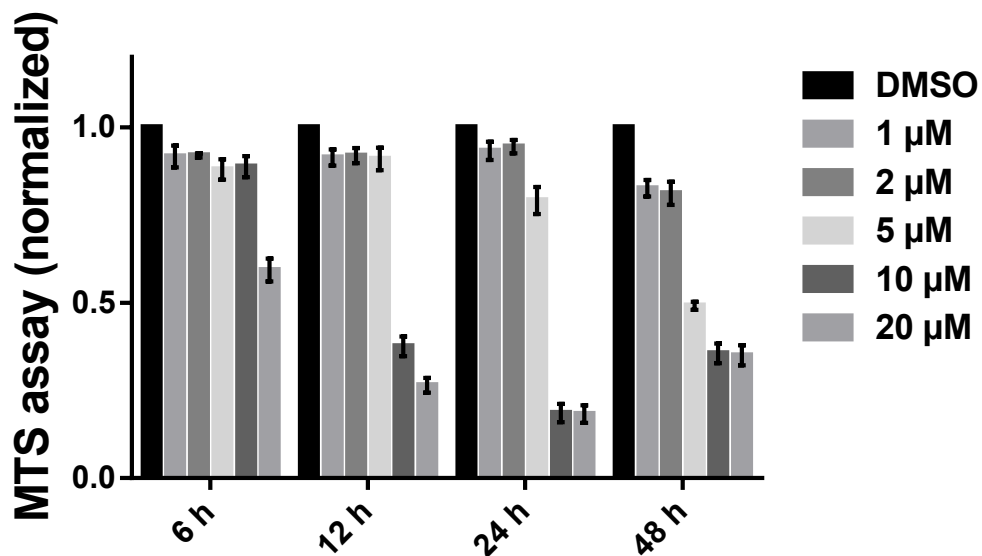

**Fig. S5** Cytotoxicity of RC-TPP. HeLa cells were incubated with various doses of RC-TPP (0, 1, 2, 5, 10 and 20  $\mu\text{M}$ ) for 30 min and washed with PBS for 3 times then incubated with fresh medium for 6, 12, 24, 48 h. The cell number and cell viability were determined by MTS assay.

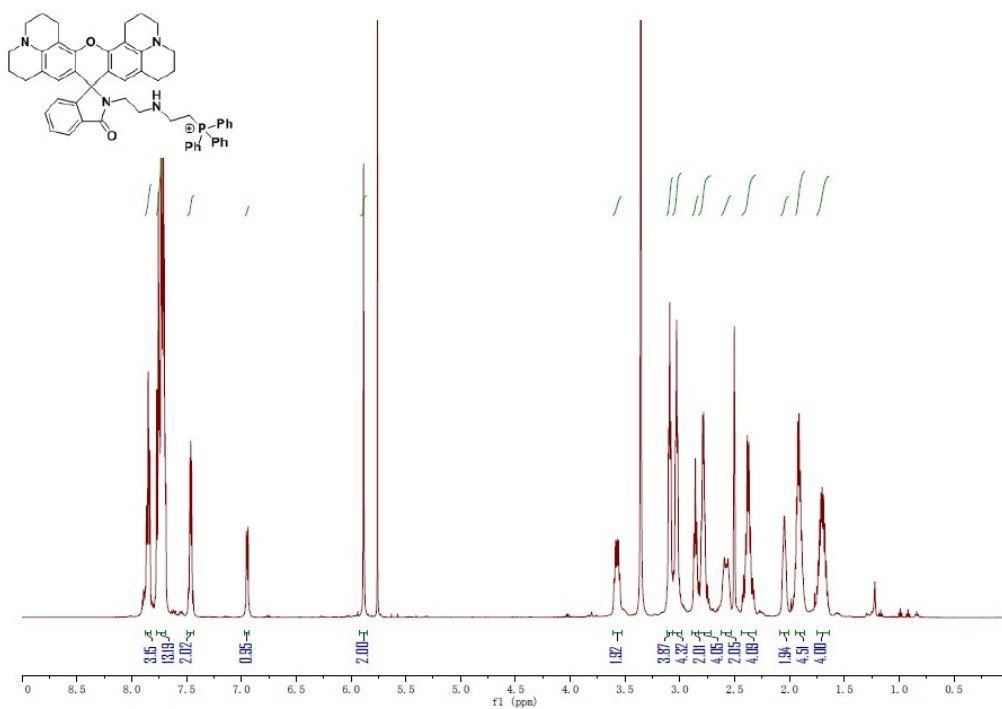

**Fig. S6**  $^1\text{H}$ -NMR Spectrum of ROX-EDA-TPP

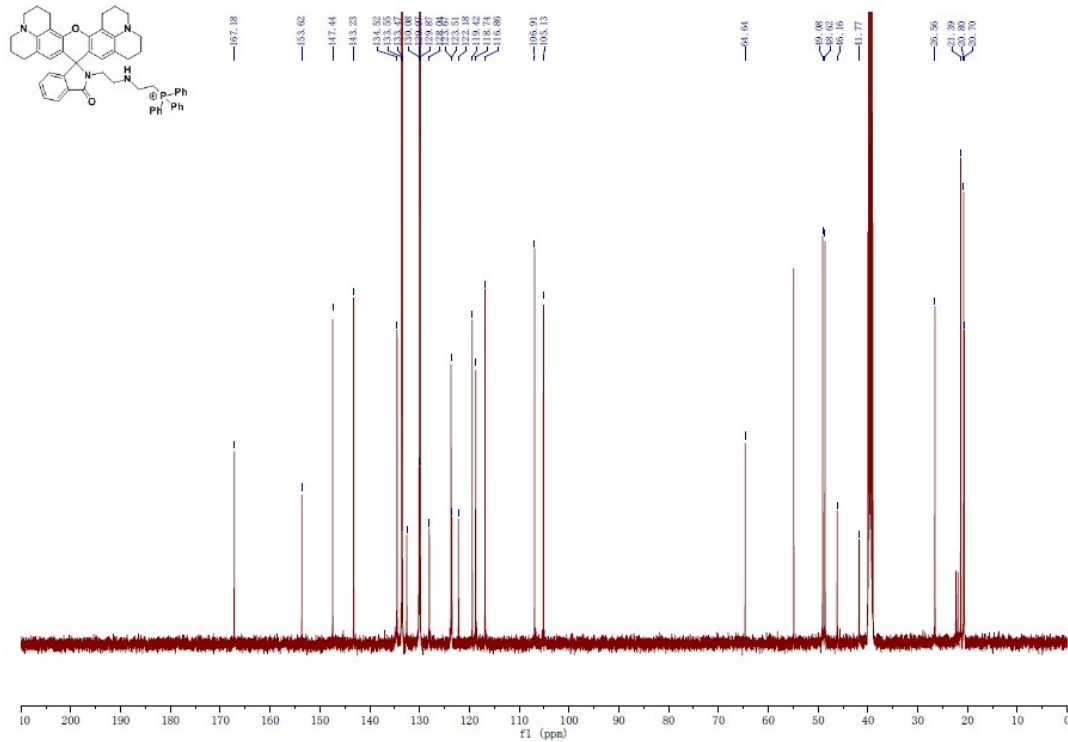

Fig. S7 <sup>13</sup>C-NMR Spectrum of ROX-EDA-TPP

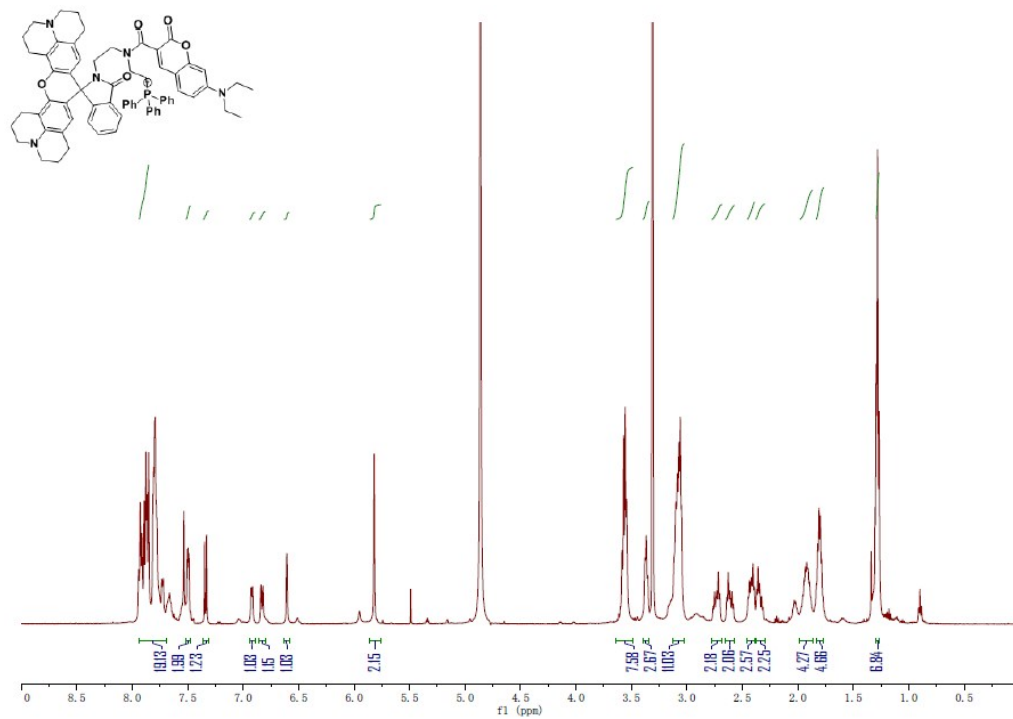

Fig. S8 <sup>1</sup>H-NMR Spectrum of RC-TPP

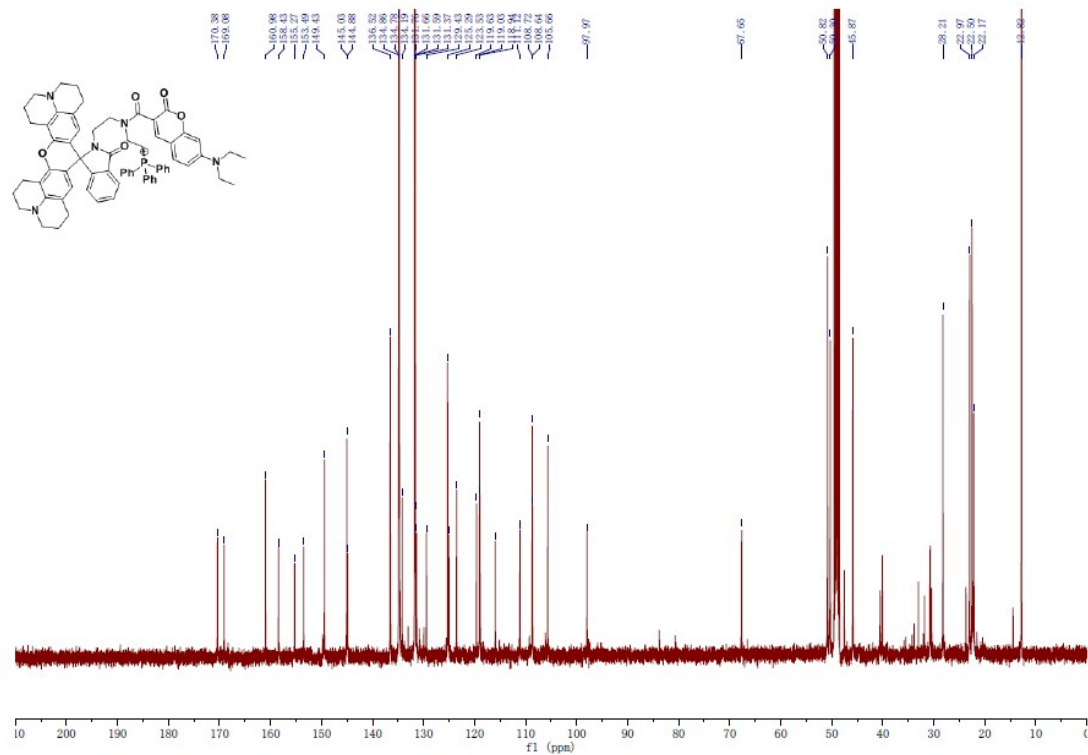

Fig. S9 <sup>13</sup>C-NMR Spectrum of RC-TPP

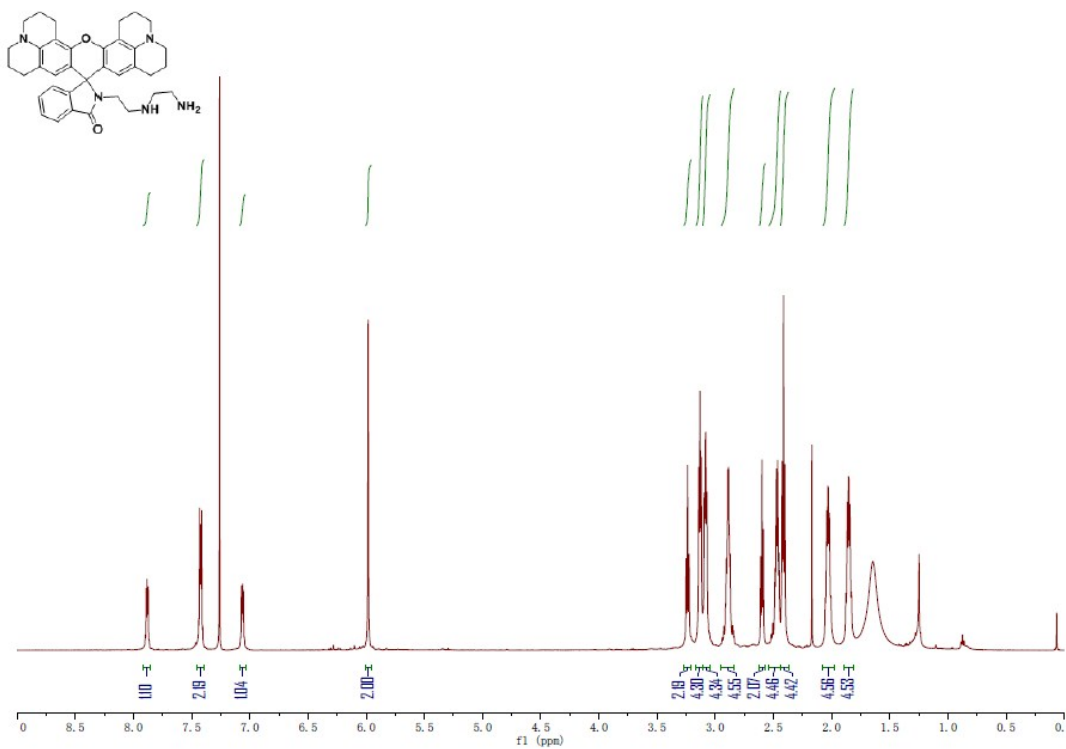

Fig. S10 <sup>1</sup>H-NMR Spectrum of ROX-ETA

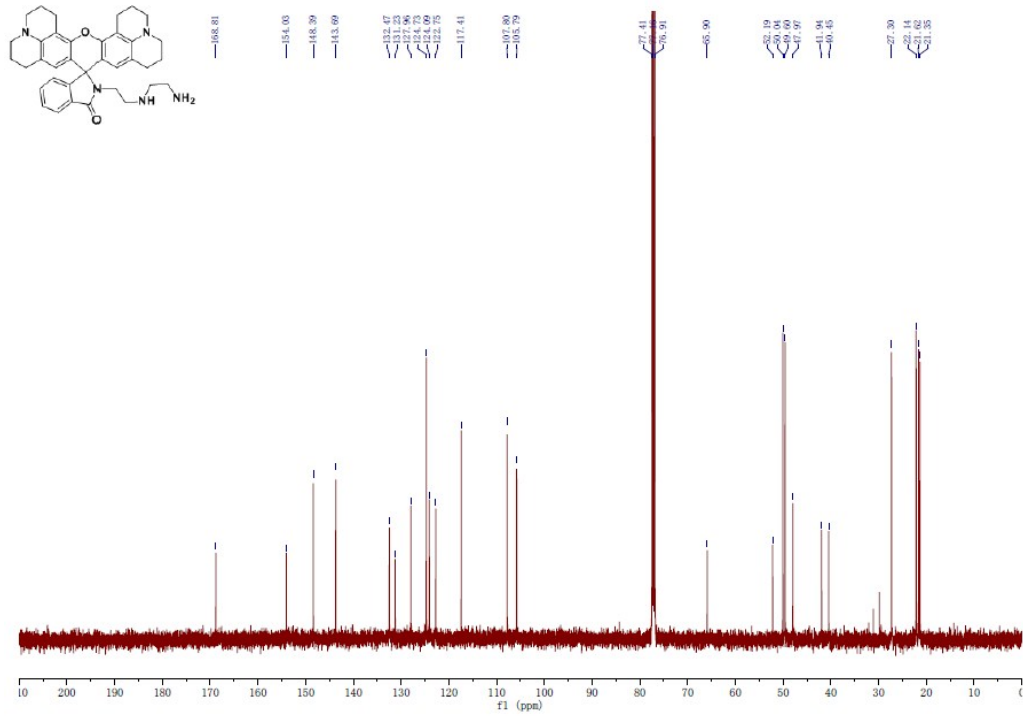

**Fig. S11** <sup>13</sup>C-NMR Spectrum of ROX-ETA
